# Supplementary material
Source: publisher site journal article supplement (https://www.spandidos-publications.com/1994/downloadSupplementary)

Figure S1. Expression of pAKT and tAKT with the addition of porcine insulin in HCC4006 cells. (A and B) HCC4006 cells were treated with 100 nM porcine insulin. The results of pAKT and tAKT at 0, 60 min and 24 h are shown (A) in the representative western blots and (B) in the bar graphs. p, phosphorylated; t, total.

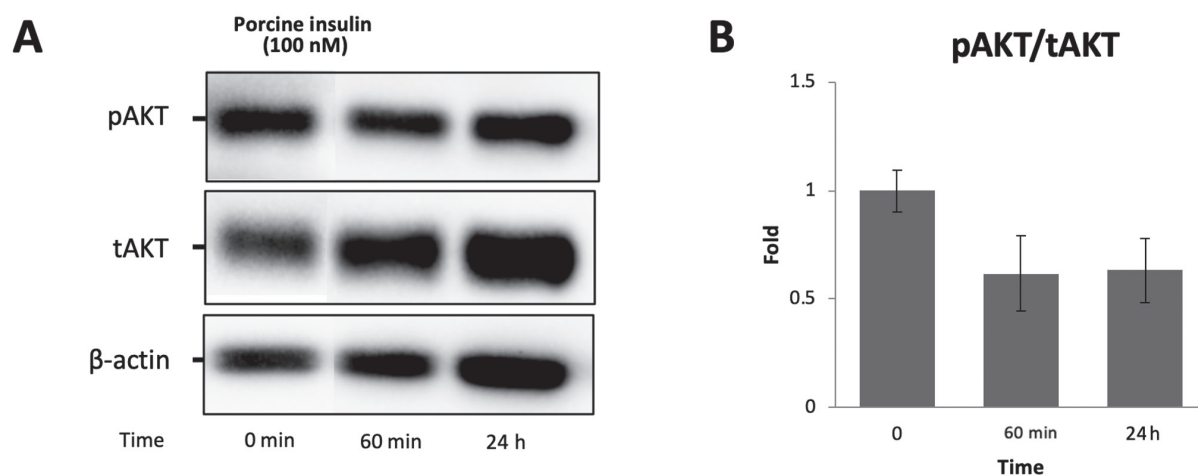

Figure S2. AKT1-knockdown through siRNA transfection is able to rescue gefitinib resistance induced by glargine. (A and B) HCC4006 cells treated with or without 10 nM AKT1 siRNA, and then treated with or without 100 nM glargine for 24 h, and the results of pIGFR and tIGFR are shown in the representative western blots and in the bar graphs. (C) HCC4006 cells with AKT-knockdown treated with gefitinib for 24 h, and cell survival was measured using an MTS proliferation assay. (D and E) HCC4006 cells treated with or without 10 nM AKT1 siRNA, and subsequently treated with 32  $\mu$ M gefitinib, 100 nM glargine, or both. The results are shown in the representative western blots and the bar graphs. Quantification of the results of the western blot analysis of pERK and tERK is shown. The vertical bars indicate the fold-change compared with the control group. \* $P < 0.05$  vs. control group using a one-way ANOVA with Tukey's post hoc test. siRNA, small interfering RNA; p, phosphorylated; t, total; KD, knockdown; IGFR, insulin growth factor receptor.

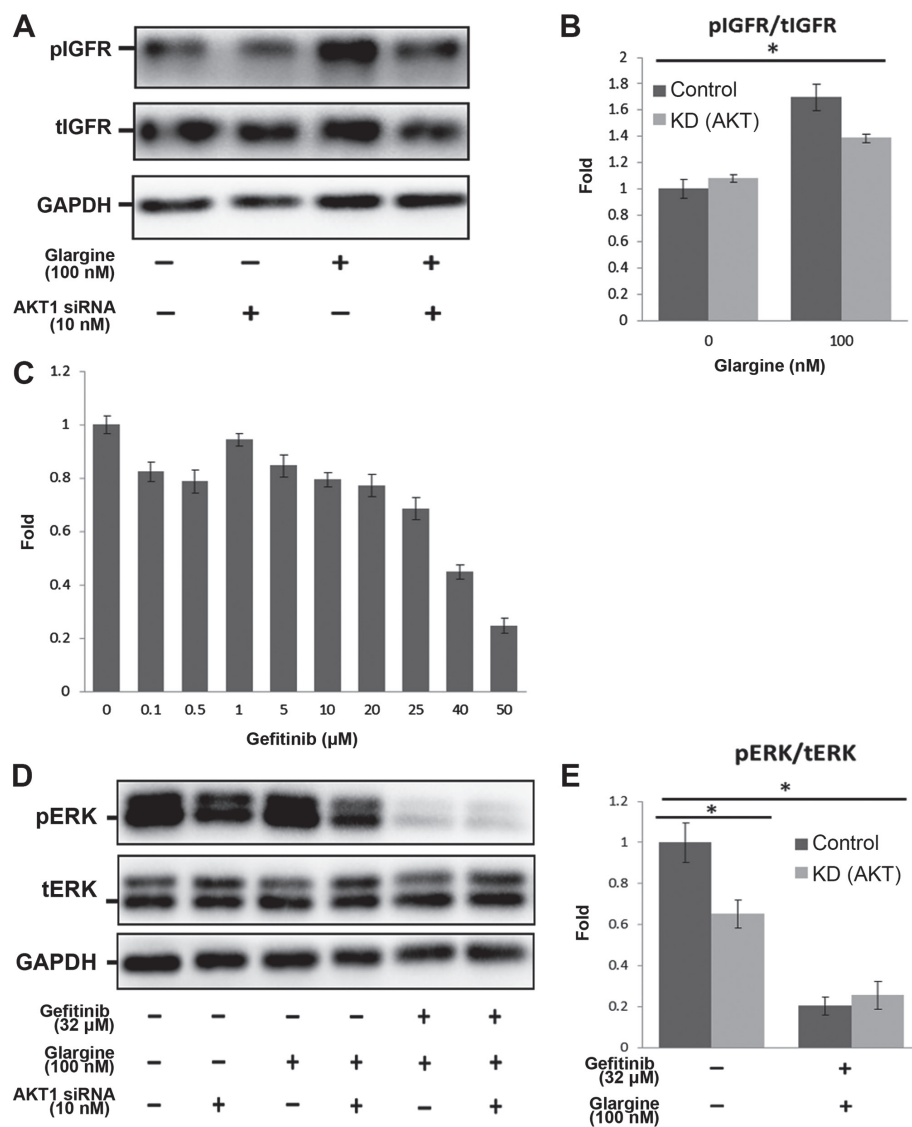

Supplement: Supplementary file 1 [file downloadSupplementary]
